# Supplementary material
Source: PubMed Central journal article supplement (PMC4964928)
Supplement: NIHMS68312-supplement-Supplementary_Table_2.pdf [file NIHMS68312-supplement-Supplementary_Table_2.pdf]

| siRNA Oligos       |                           |
|--------------------|---------------------------|
| Against myosin VI  | Sequence (5'-3')          |
| Myosin VI Oligo 2  | CAAGGAGTTATGCTGACATAATTCT |
| Myosin VI Oligo 3  | GAGGCTGCACTAGATACTTTGCTAA |
| Against optineurin | Sequence (5'-3')          |
| Optineurin Oligo 1 | GCATTGTCTAAATATAGGATT     |
| Optineurin Oligo 2 | GGAGACTGTTGGAGCGAATT      |

| shRNA                                    |                                                             |
|------------------------------------------|-------------------------------------------------------------|
| Against myosin VI                        | Sequence (5'-3')                                            |
| shRNA against Myosin VI motor domain Rev | TGGAATATTGTGCTGAATTATTCAAGAGATAATTCAGCACAATATTCTTTTTTC      |
| shRNA against Myosin VI motor domain For | TCGAGAAAAAAGGAATATTGTGCTGAATTATCTCTTGAATAATTCAGCACAATATTCCA |

| DNA Oligos                         |                                                        |
|------------------------------------|--------------------------------------------------------|
| For RT-PCR                         | Sequence (5'-3')                                       |
| Isoform detection by PCR For       | CCGAGCTCATCAGTGATGAGGC                                 |
| Isoform detection by PCR Rev       | CCAAGCATGATACACTTTTAGTCTCC                             |
|                                    |                                                        |
| DNA Oligos for isoforms generation | Sequence (5'-3')                                       |
| Isoform 2 For                      | GGTACTAAGAAATATGATCTTAGTAAATGG                         |
| Isoform 2 Rev                      | TCTCCGCAGCGCCAGGTCGGC                                  |
| Isoform 3 For                      | CCGGTGACAAGCAAAAATGATGGAACAAGACCCAAAATGA               |
| Isoform 3 Rev                      | ATAGCTATCCAGGCTCCGCAGCGCCAGGTCGGCC                     |
|                                    |                                                        |
| DNA Oligos for mutagenesis         | Sequence (5'-3')                                       |
| Mutagenesis RRL/AAA For            | CTTGACAGAGAAGAATTTTCATGCGGCAGCAAAAGTGTATCATGCTTGGAAATC |
| Mutagenesis RRL/AAA Rev            | GATTTCCAAGCATGATACACTTTTGCTGCCGCATGAAATTCTTCTCTGCAAG   |
| Mutagenesis RRL/RRA For (L1118A)   | CTTGACAGAGAAGAATTTTCATAGGAGAGCAAAAGTGTATCATGCTTGGAAATC |
| Mutagenesis RRL/RRA Rev (L1118A)   | GATTTCCAAGCATGATACACTTTTGCTCTCCTATGAAATTCTTCTCTGCAAG   |
| Mutagenesis RRL/ARL For (R1116A)   | CTTGACAGAGAAGAATTTTCATGCGAGACTAAAAGTGTATCATGCTTGGAAATC |
| Mutagenesis RRL/ARL Rev (R1116A)   | GATTTCCAAGCATGATACACTTTTAGTCTCGCATGAAATTCTTCTCTGCAAG   |
| Mutagenesis RRL/RAL Rev (R1117A)   | GCAGAGAAGAATTTTCATAGGGCACTAAAAGTGTATCATGCTTGG          |
| Mutagenesis RRL/RAL Rev (R1117A)   | CCAAGCATGATACACTTTTAGTGCCCTATGAAATTCTTCTCTGC           |
| Mutagenesis WWY/WLY For (W1192L)   | CCCTCAGAGTAAGAAAAAAGGCTGGTTGTATGCCATTTTGATGGACC        |
| Mutagenesis WWY/WLY Rev (W1192L)   | GGTCCATCAAATGGGCATACAACCAGCCTTTTTTCTTACTCTGAGGG        |
| Mutagenesis M1062Q For             | CCGGAACAAATGGCCAAAGAACAGTCAGAATTTTGAGTAGAGG            |
| Mutagenesis M1062Q Rev             | CCTCTACTCAAAAATTCTGACTGTTCTTTGGCCATTTGTTCCGG           |
